# Supplementary material for: Interspecies conservation of organisation and function between nonhomologous regional centromeres
Source: PubMed Central journal article supplement (PMC6538654; doi:10.1038/s41467-019-09824-4), 2019-05-28
Supplement: 41467_2019_9824_MOESM3_ESM.pdf [file 41467_2019_9824_MOESM3_ESM.pdf]

## Description of Additional Supplementary Files

File Name: Supplementary Data 1

Description: *S. cryophilus* telomere and subtelomere repeat co-ordinates

File Name: Supplementary Data 2

Description: *S. octosporus* telomere and subtelomere repeat co-ordinates

File Name: Supplementary Data 3

Description: *S. cryophilus* centromere repeat co-ordinates

File Name: Supplementary Data 4

Description: *S. octosporus* centromere repeat co-ordinates

File Name: Supplementary Data 5

Description: *S. pombe* centromere repeat co-ordinates

File Name: Supplementary Data 6

Description: *S. cryophilus* rDNA co-ordinates

File Name: Supplementary Data 7

Description: *S. octosporus* rDNA co-ordinates

File Name: Supplementary Data 8

Description: *S. cryophilus* and *S. octosporus* hsp16 ORFs

File Name: Supplementary Data 9

Description: *S. cryophilus* tDNA co-ordinates

File Name: Supplementary Data 10

Description: *S. octosporus* tDNA co-ordinates

File Name: Supplementary Data 11

Description: *S. japonicus* CENP-A associated regions: co-ordinates for PCA (Supp Fig 6)
